# Supplementary material
Source: PubMed Central journal article supplement (PMC5536839)
Supplement: NIHMS885367-supplement-Supplemental_Tables_1-4.pdf [file NIHMS885367-supplement-Supplemental_Tables_1-4.pdf]

**Supplementary Table S1. Number of participants with values below limit of detection (LOD) and corresponding percentage out of the total number of participants included in the analyses for each of the ratios.**

| <b>Ratio</b>   | <b>Sample N&lt;LOD<br/>MEHP</b> | <b>Sample N&lt;LOD<br/>MEHHP</b> | <b>Sample N&lt;LOD<br/>MECPP</b> | <b>Sample N&lt;LOD<br/>MEOHP</b> |
|----------------|---------------------------------|----------------------------------|----------------------------------|----------------------------------|
| logpercentMEHP | 1,612 (30.6%)                   | 28 (0.5%)                        | 3 (0.1%)                         | 69 (1.3%)                        |
| MEHHP:MECPP    |                                 | 29 (0.6%)                        | 4 (0.1%)                         |                                  |
| MEHP:MEHHP     | 1,801 (28.2%)                   | 46 (0.7%)                        |                                  |                                  |
| MEHHP:MEOHP    |                                 | 56 (0.9%)                        |                                  | 116 (1.8%)                       |
| MEOHP:MECPP    |                                 |                                  | 3 (0.1%)                         | 69 (1.3%)                        |

Note: The values <LOD are substituted with LOD divided by square root of 2 in the analysis.

**Supplementary Table S2. Associations of Individual Characteristics and Lifestyle Factors With MEHHP:MECPP (Regression Estimates and 95% Confidence Intervals) NHANES 2001-2012.**

| Characteristic          |                                    | All participants     |                       |                      |                       | Participants with no prescription medication use in the past month |                       |                      |                       |
|-------------------------|------------------------------------|----------------------|-----------------------|----------------------|-----------------------|--------------------------------------------------------------------|-----------------------|----------------------|-----------------------|
|                         |                                    | Model 1 <sup>a</sup> |                       | Model 2 <sup>b</sup> |                       | Model 1 <sup>a</sup>                                               |                       | Model 2 <sup>b</sup> |                       |
|                         |                                    | $\beta$              | 95% CI                | $\beta$              | 95% CI                | $\beta$                                                            | 95% CI                | $\beta$              | 95% CI                |
| <b>Age (continuous)</b> | Estimates                          | <b>-0.001</b>        | <b>-0.001, -0.001</b> | <b>-0.001</b>        | <b>-0.002, -0.001</b> | <b>0.001</b>                                                       | <b>-0.001, 0.001</b>  | <b>-0.001</b>        | <b>-0.001, 0.001</b>  |
| <b>Race</b>             | Caucasian                          | 0.000                | Reference             | 0.000                | Reference             | 0.000                                                              | Reference             | 0.000                | Reference             |
|                         | Other Race                         | <b>-0.062</b>        | <b>-0.099, -0.025</b> | <b>-0.048</b>        | <b>-0.087, -0.009</b> | -0.024                                                             | -0.070, 0.021         | -0.010               | -0.056, 0.037         |
|                         | Mexican-American or other Hispanic | <b>-0.042</b>        | <b>-0.061, -0.025</b> | <b>-0.027</b>        | <b>-0.047, -0.007</b> | -0.023                                                             | -0.047, 0.001         | -0.010               | -0.035, 0.015         |
|                         | Non-Hispanic Black                 | <b>0.103</b>         | <b>0.068, 0.139</b>   | <b>0.121</b>         | <b>0.087, 0.155</b>   | 0.115                                                              | <b>0.068, 0.163</b>   | <b>0.132</b>         | <b>0.086, 0.179</b>   |
| <b>Gender</b>           | Male                               | 0.000                | Reference             | 0.000                | Reference             | 0.000                                                              | Reference             | 0.000                | Reference             |
|                         | <b>Female</b>                      | <b>-0.033</b>        | <b>-0.053, -0.013</b> | <b>-0.033</b>        | <b>-0.053, -0.012</b> | <b>-0.057</b>                                                      | <b>-0.085, -0.029</b> | <b>-0.051</b>        | <b>-0.079, -0.022</b> |
| <b>Body Mass Index</b>  | Normal                             | 0.000                | Reference             | 0.000                | Reference             | 0.000                                                              | Reference             | 0.000                | Reference             |
|                         | Underweight                        | 0.047                | -0.025, 0.120         | 0.044                | -0.028, 0.116         | -0.011                                                             | -0.097, 0.076         | -0.012               | -0.101, 0.076         |
|                         | Overweight                         | 0.002                | -0.021, 0.026         | 0.003                | -0.020, 0.026         | 0.003                                                              | -0.026, 0.032         | 0.005                | -0.024, 0.034         |
| <b>Smoking</b>          | Never smoker                       | 0.000                | Reference             | 0.000                | Reference             | 0.000                                                              | Reference             | 0.000                | Reference             |
|                         | Past smoker                        | 0.009                | -0.019, 0.037         | 0.002                | -0.026, 0.031         | 0.023                                                              | -0.013, 0.060         | 0.016                | -0.020, 0.051         |
|                         | Current smoker                     | <b>0.040</b>         | <b>0.012, 0.068</b>   | <b>0.028</b>         | <b>0.001, 0.055</b>   | <b>0.031</b>                                                       | <b>0.005, 0.058</b>   | 0.021                | -0.006, 0.049         |
| <b>Alcohol use</b>      | None                               | 0.000                | Reference             | 0.000                | Reference             | 0.000                                                              | Reference             | 0.000                | Reference             |
|                         | Below limit                        | 0.017                | -0.012, 0.046         | 0.016                | -0.012, 0.044         | 0.012                                                              | -0.035, 0.059         | 0.010                | -0.038, 0.058         |
|                         | Above limit                        | <b>0.073</b>         | <b>0.030, 0.117</b>   | <b>0.066</b>         | <b>0.023, 0.110</b>   | 0.074                                                              | -0.001, 0.148         | 0.067                | -0.007, 0.142         |
| <b>Cancer history</b>   | No                                 | 0.000                | Reference             | 0.000                | Reference             | 0.000                                                              | Reference             | 0.000                | Reference             |
|                         | Yes                                | -0.022               | -0.065, 0.021         | -0.025               | -0.068, 0.019         | 0.031                                                              | -0.047, 0.109         | 0.029                | -0.048, 0.106         |

| Characteristic                                    | All participants     |                     |                      |                     | Participants with no prescription medication use in the past month |                     |                      |                     |  |
|---------------------------------------------------|----------------------|---------------------|----------------------|---------------------|--------------------------------------------------------------------|---------------------|----------------------|---------------------|--|
|                                                   | Model 1 <sup>a</sup> |                     | Model 2 <sup>b</sup> |                     | Model 1 <sup>a</sup>                                               |                     | Model 2 <sup>b</sup> |                     |  |
|                                                   | $\beta$              | 95% CI              | $\beta$              | 95% CI              | $\beta$                                                            | 95% CI              | $\beta$              | 95% CI              |  |
| <b>Caffeine, mg<sup>c</sup></b>                   |                      |                     |                      |                     |                                                                    |                     |                      |                     |  |
| 1 <sup>st</sup> quartile                          | 0.000                | Reference           | 0.000                | Reference           | 0.000                                                              | Reference           | 0.000                | Reference           |  |
| 2 <sup>nd</sup> quartile                          | <b>0.037</b>         | <b>0.004, 0.071</b> | <b>0.036</b>         | <b>0.004, 0.069</b> | 0.027                                                              | -0.018, 0.071       | 0.027                | -0.017, 0.072       |  |
| 3 <sup>rd</sup> quartile                          | <b>0.042</b>         | <b>0.014, 0.069</b> | <b>0.038</b>         | <b>0.010, 0.065</b> | 0.027                                                              | -0.010, 0.064       | 0.027                | -0.011, 0.065       |  |
| 4 <sup>th</sup> quartile                          | <b>0.050</b>         | <b>0.019, 0.080</b> | <b>0.042</b>         | <b>0.012, 0.072</b> | <b>0.049</b>                                                       | <b>0.013, 0.084</b> | <b>0.046</b>         | <b>0.009, 0.083</b> |  |
| <b>Prescription medication in the past month</b>  |                      |                     |                      |                     |                                                                    |                     |                      |                     |  |
| None                                              | 0.000                | Reference           | 0.000                | Reference           | NA                                                                 | NA                  | NA                   | NA                  |  |
| Any                                               | <b>0.029</b>         | <b>0.008, 0.050</b> | <b>0.031</b>         | <b>0.009, 0.053</b> | NA                                                                 | NA                  | NA                   | NA                  |  |
| <b>Menopausal status/hormone use (women only)</b> |                      |                     |                      |                     |                                                                    |                     |                      |                     |  |
| Premenopausal                                     | 0.000                | Reference           | 0.000                | Reference           | 0.000                                                              | Reference           | 0.000                | Reference           |  |
| Postmenopausal/Never used                         | -0.068               | -0.134, -0.002      | -0.073               | -0.140, -0.006      | -0.057                                                             | -0.113, -0.002      | -0.066               | -0.124, -0.008      |  |
| Postmenopausal/Past, not current                  | -0.023               | -0.098, 0.053       | -0.030               | -0.106, 0.045       | 0.030                                                              | -0.098, 0.159       | 0.021                | -0.111, 0.153       |  |
| Postmenopausal/Past, unknown current              | -0.055               | -0.156, 0.045       | -0.068               | -0.168, 0.033       | -0.221                                                             | -0.453, 0.011       | -0.197               | -0.419, 0.024       |  |
| Postmenopausal/Current                            | 0.078                | -0.012, 0.167       | 0.059                | -0.035, 0.153       | NA                                                                 | NA                  | NA                   | NA                  |  |

Abbreviations: CI, Confidence Interval; NA, Not Applicable

<sup>a</sup> Adjusted for age, BMI, and race

<sup>b</sup> Adjusted for age, BMI, race, and all other factors in the analyses

<sup>c</sup> 1<sup>st</sup> quartile <10; 2<sup>nd</sup> quartile 10-<91 ; 3<sup>rd</sup> quartile 91-<208; and 4<sup>th</sup> quartile  $\geq$ 208 mg

**Supplementary Table S3. Associations of Individual Characteristics and Lifestyle Factors With MEOHP:MECPP (Regression Estimates and 95% Confidence Intervals), NHANES 2001-2012.**

| Characteristic          |                                    | All participants     |                       |                      |                       | Participants with no prescription medication use in the past month |                       |                      |                       |
|-------------------------|------------------------------------|----------------------|-----------------------|----------------------|-----------------------|--------------------------------------------------------------------|-----------------------|----------------------|-----------------------|
|                         |                                    | Model 1 <sup>a</sup> |                       | Model 2 <sup>b</sup> |                       | Model 1 <sup>a</sup>                                               |                       | Model 2 <sup>b</sup> |                       |
|                         |                                    | $\beta$              | 95% CI                | $\beta$              | 95% CI                | $\beta$                                                            | 95% CI                | $\beta$              | 95% CI                |
| <b>Age (continuous)</b> | Estimates                          | <b>-0.001</b>        | <b>-0.001, -0.001</b> | <b>-0.001</b>        | <b>-0.001, -0.001</b> | -0.001                                                             | -0.001, 0.001         | -0.001               | -0.001, 0.001         |
| <b>Race</b>             | Caucasian                          | 0.000                | Reference             | 0.000                | Reference             | 0.000                                                              | Reference             | 0.000                | Reference             |
|                         | Other Race                         | <b>-0.032</b>        | <b>-0.055, -0.009</b> | <b>-0.025</b>        | <b>-0.050, -0.001</b> | <b>-0.008</b>                                                      | -0.033, 0.018         | -0.004               | -0.030, 0.022         |
|                         | Mexican-American or other Hispanic | <b>-0.031</b>        | <b>-0.042, -0.020</b> | <b>-0.024</b>        | <b>-0.035, -0.012</b> | <b>-0.022</b>                                                      | <b>-0.035, -0.009</b> | <b>-0.019</b>        | <b>-0.033, -0.004</b> |
|                         | Non-Hispanic Black                 | <b>0.050</b>         | <b>0.031, 0.069</b>   | <b>0.058</b>         | <b>0.039, 0.077</b>   | <b>0.057</b>                                                       | <b>0.030, 0.083</b>   | <b>0.062</b>         | <b>0.035, 0.089</b>   |
| <b>Gender</b>           | Male                               | 0.000                | Reference             | 0.000                | Reference             | 0.000                                                              | Reference             | 0.000                | Reference             |
|                         | Female                             | 0.009                | -0.001, 0.020         | 0.010                | -0.002, 0.021         | -0.001                                                             | -0.015, 0.015         | 0.001                | -0.015, 0.017         |
| <b>Body Mass Index</b>  | Normal                             | 0.000                | Reference             | 0.000                | Reference             | 0.000                                                              | Reference             | 0.000                | Reference             |
|                         | Underweight                        | 0.033                | -0.013, 0.080         | 0.031                | -0.015, 0.077         | -0.002                                                             | -0.060, 0.056         | -0.005               | -0.063, 0.053         |
|                         | Overweight                         | 0.003                | -0.011, 0.017         | 0.004                | -0.010, 0.018         | -0.001                                                             | -0.015, 0.015         | 0.001                | -0.014, 0.016         |
| <b>Smoking</b>          | Never smoker                       | 0.000                | Reference             | 0.000                | Reference             | 0.000                                                              | Reference             | 0.000                | Reference             |
|                         | Past smoker                        | 0.008                | -0.009, 0.024         | 0.005                | -0.012, 0.022         | 0.006                                                              | -0.013, 0.025         | 0.004                | -0.015, 0.024         |
|                         | Current smoker                     | <b>0.019</b>         | <b>0.007, 0.031</b>   | <b>0.017</b>         | <b>0.005, 0.029</b>   | 0.011                                                              | -0.004, 0.025         | 0.010                | -0.006, 0.026         |
| <b>Alcohol use</b>      | None                               | 0.000                | Reference             | 0.000                | Reference             | 0.000                                                              | Reference             | 0.000                | Reference             |
|                         | Below limit                        | 0.011                | -0.006, 0.027         | 0.010                | -0.006, 0.026         | -0.016                                                             | -0.044, 0.012         | -0.017               | -0.045, 0.011         |
|                         | Above limit                        | 0.011                | -0.009, 0.032         | 0.008                | -0.012, 0.028         | -0.017                                                             | -0.054, 0.019         | -0.021               | -0.057, 0.016         |
| <b>Cancer history</b>   | No                                 | 0.000                | Reference             | 0.000                | Reference             | 0.000                                                              | Reference             | 0.000                | Reference             |
|                         | Yes                                | -0.003               | -0.027, 0.021         | -0.004               | -0.028, 0.020         | 0.015                                                              | -0.033, 0.064         | 0.017                | -0.031, 0.066         |

| Characteristic                                    | All participants     |                     |                      |                     | Participants with no prescription medication use in the past month |                     |                      |                     |
|---------------------------------------------------|----------------------|---------------------|----------------------|---------------------|--------------------------------------------------------------------|---------------------|----------------------|---------------------|
|                                                   | Model 1 <sup>a</sup> |                     | Model 2 <sup>b</sup> |                     | Model 1 <sup>a</sup>                                               |                     | Model 2 <sup>b</sup> |                     |
|                                                   | $\beta$              | 95% CI              | $\beta$              | 95% CI              | $\beta$                                                            | 95% CI              | $\beta$              | 95% CI              |
| <b>Caffeine, mg<sup>c</sup></b>                   |                      |                     |                      |                     |                                                                    |                     |                      |                     |
| 1 <sup>st</sup> quartile                          | 0.000                | Reference           | 0.000                | Reference           | 0.000                                                              | Reference           | 0.000                | Reference           |
| 2 <sup>nd</sup> quartile                          | <b>0.019</b>         | <b>0.005, 0.034</b> | <b>0.019</b>         | <b>0.004, 0.033</b> | 0.018                                                              | -0.005, 0.040       | 0.018                | -0.005, 0.041       |
| 3 <sup>rd</sup> quartile                          | <b>0.019</b>         | <b>0.004, 0.034</b> | <b>0.017</b>         | <b>0.003, 0.032</b> | 0.007                                                              | -0.016, 0.030       | 0.007                | -0.017, 0.031       |
| 4 <sup>th</sup> quartile                          | <b>0.023</b>         | <b>0.007, 0.039</b> | <b>0.019</b>         | <b>0.003, 0.035</b> | <b>0.023</b>                                                       | <b>0.002, 0.044</b> | <b>0.023</b>         | <b>0.001, 0.044</b> |
| <b>Prescription medication in past month</b>      |                      |                     |                      |                     |                                                                    |                     |                      |                     |
| None                                              | 0.000                | Reference           | 0.000                | Reference           | NA                                                                 | NA                  | NA                   | NA                  |
| Any                                               | <b>0.014</b>         | <b>0.002, 0.027</b> | <b>0.014</b>         | <b>0.002, 0.027</b> | NA                                                                 | NA                  | NA                   | NA                  |
| <b>Menopausal status/hormone use (women only)</b> |                      |                     |                      |                     |                                                                    |                     |                      |                     |
| Premenopausal                                     | 0.000                | Reference           | 0.000                | Reference           | 0.000                                                              | Reference           | 0.000                | Reference           |
| Postmenopausal/Never used                         | -0.039               | -0.074, -0.003      | -0.043               | -0.080, -0.007      | -0.020                                                             | -0.053, 0.014       | -0.027               | -0.062, 0.008       |
| Postmenopausal/Past, not current                  | -0.030               | -0.070, 0.010       | -0.037               | -0.077, 0.003       | 0.003                                                              | -0.075, 0.081       | -0.003               | -0.083, 0.076       |
| Postmenopausal/Past, unknown current              | -0.016               | -0.071, 0.038       | -0.024               | -0.079, 0.031       | -0.101                                                             | -0.246, 0.043       | -0.105               | -0.256, 0.045       |
| Postmenopausal/Current                            | 0.047                | -0.004, 0.098       | 0.035                | -0.018, 0.088       | NA                                                                 | NA                  | NA                   | NA                  |

Abbreviations: CI, Confidence Interval; NA, Not Applicable

<sup>a</sup> Adjusted for age, BMI, and race

<sup>b</sup> Adjusted for age, BMI, race, and all other factors in the analyses

<sup>c</sup> 1<sup>st</sup> quartile <10; 2<sup>nd</sup> quartile 10-<91 ; 3<sup>rd</sup> quartile 91-<208; and 4<sup>th</sup> quartile  $\geq$ 208 mg

**Supplementary Table S4. Associations of Individual Characteristics and Lifestyle Factors With MEHHP:MEOHP (Regression Estimates and 95% Confidence Intervals) NHANES 2001-2012.**

| Characteristic          |                                    | All participants     |                       |                      |                       | Participants with no prescription medication use in the past month |                       |                      |                       |
|-------------------------|------------------------------------|----------------------|-----------------------|----------------------|-----------------------|--------------------------------------------------------------------|-----------------------|----------------------|-----------------------|
|                         |                                    | Model 1 <sup>a</sup> |                       | Model 2 <sup>b</sup> |                       | Model 1 <sup>a</sup>                                               |                       | Model 2 <sup>b</sup> |                       |
|                         |                                    | $\beta$              | 95% CI                | $\beta$              | 95% CI                | $\beta$                                                            | 95% CI                | $\beta$              | 95% CI                |
| <b>Age (continuous)</b> | Estimates                          | 0.001                | -0.001, 0.001         | -0.001               | -0.001, 0.001         | 0.001                                                              | -0.001, 0.002         | 0.001                | -0.001, 0.002         |
| <b>Race</b>             | Caucasian                          | 0.000                | Reference             | 0.000                | Reference             | 0.000                                                              | Reference             | 0.000                | Reference             |
|                         | Other Race                         | -0.003               | -0.063, 0.058         | 0.012                | -0.048, 0.072         | -0.006                                                             | -0.071, 0.060         | 0.021                | -0.044, 0.086         |
|                         | Mexican-American or other Hispanic | -0.003               | -0.039, 0.032         | 0.010                | -0.026, 0.046         | 0.013                                                              | -0.032, 0.058         | 0.030                | -0.014, 0.075         |
|                         | Non-Hispanic Black                 | 0.040                | -0.007, 0.087         | <b>0.052</b>         | <b>0.003, 0.102</b>   | 0.046                                                              | -0.006, 0.098         | <b>0.064</b>         | <b>0.010, 0.117</b>   |
| <b>Gender</b>           | Male                               | 0.000                | Reference             | 0.000                | Reference             | 0.000                                                              | Reference             | 0.000                | Reference             |
|                         | <b>Female</b>                      | <b>-0.112</b>        | <b>-0.142, -0.082</b> | <b>-0.108</b>        | <b>-0.138, -0.077</b> | <b>-0.133</b>                                                      | <b>-0.173, -0.092</b> | <b>-0.119</b>        | <b>-0.159, -0.079</b> |
| <b>Body Mass Index</b>  | Normal                             | 0.000                | Reference             | 0.000                | Reference             | 0.000                                                              | Reference             | 0.000                | Reference             |
|                         | Underweight                        | -0.004               | -0.083, 0.076         | -0.005               | -0.085, 0.075         | -0.032                                                             | -0.134, 0.070         | -0.031               | -0.135, 0.074         |
|                         | Overweight                         | -0.013               | -0.045, 0.019         | -0.015               | -0.046, 0.016         | 0.005                                                              | -0.043, 0.052         | 0.004                | -0.042, 0.051         |
| <b>Smoking</b>          | Never smoker                       | 0.000                | Reference             | 0.000                | Reference             | 0.000                                                              | Reference             | 0.000                | Reference             |
|                         | Past smoker                        | 0.009                | -0.022, 0.039         | -0.005               | -0.037, 0.028         | 0.030                                                              | -0.021, 0.081         | 0.015                | -0.032, 0.062         |
|                         | Current smoker                     | <b>0.059</b>         | <b>0.018, 0.101</b>   | <b>0.033</b>         | -0.006, 0.073         | <b>0.051</b>                                                       | <b>0.001, 0.101</b>   | 0.023                | -0.020, 0.067         |
| <b>Alcohol use</b>      | None                               | 0.000                | Reference             | 0.000                | Reference             | 0.000                                                              | Reference             | 0.000                | Reference             |
|                         | Below limit                        | -0.044               | -0.093, 0.005         | -0.042               | -0.089, 0.006         | 0.042                                                              | -0.018, 0.102         | 0.042                | -0.018, 0.101         |
|                         | Above limit                        | <b>0.110</b>         | <b>0.032, 0.188</b>   | <b>0.102</b>         | <b>0.026, 0.178</b>   | <b>0.230</b>                                                       | <b>0.113, 0.347</b>   | <b>0.222</b>         | <b>0.109, 0.334</b>   |
| <b>Cancer history</b>   | No                                 | 0.000                | Reference             | 0.000                | Reference             | 0.000                                                              | Reference             | 0.000                | Reference             |
|                         | Yes                                | -0.040               | -0.095, 0.014         | -0.042               | -0.095, 0.011         | -0.002                                                             | -0.121, 0.116         | -0.009               | -0.124, 0.105         |

| Characteristic                                    | All participants     |               |                      |               | Participants with no prescription medication use in the past month |               |                      |               |  |
|---------------------------------------------------|----------------------|---------------|----------------------|---------------|--------------------------------------------------------------------|---------------|----------------------|---------------|--|
|                                                   | Model 1 <sup>a</sup> |               | Model 2 <sup>b</sup> |               | Model 1 <sup>a</sup>                                               |               | Model 2 <sup>b</sup> |               |  |
|                                                   | $\beta$              | 95% CI        | $\beta$              | 95% CI        | $\beta$                                                            | 95% CI        | $\beta$              | 95% CI        |  |
| <b>Caffeine, mg<sup>c</sup></b>                   |                      |               |                      |               |                                                                    |               |                      |               |  |
| 1 <sup>st</sup> quartile                          | 0.000                | Reference     | 0.000                | Reference     | 0.000                                                              | Reference     | 0.000                | Reference     |  |
| 2 <sup>nd</sup> quartile                          | -0.009               | -0.057, 0.039 | -0.009               | -0.056, 0.039 | -0.032                                                             | -0.086, 0.023 | -0.029               | -0.082, 0.023 |  |
| 3 <sup>rd</sup> quartile                          | 0.030                | -0.021, 0.081 | 0.021                | -0.031, 0.073 | 0.029                                                              | -0.030, 0.088 | 0.029                | -0.029, 0.087 |  |
| 4 <sup>th</sup> quartile                          | 0.040                | -0.006, 0.087 | 0.026                | -0.022, 0.074 | 0.030                                                              | -0.041, 0.101 | 0.021                | -0.049, 0.092 |  |
| <b>Prescription medication in past month</b>      |                      |               |                      |               |                                                                    |               |                      |               |  |
| None                                              | 0.000                | Reference     | 0.000                | Reference     | NA                                                                 | NA            | NA                   | NA            |  |
| Any                                               | 0.022                | -0.011, 0.056 | 0.024                | -0.009, 0.056 | NA                                                                 | NA            | NA                   | NA            |  |
| <b>Menopausal status/hormone use (women only)</b> |                      |               |                      |               |                                                                    |               |                      |               |  |
| Premenopausal                                     | 0.000                | Reference     | 0.000                | Reference     | 0.000                                                              | Reference     | 0.000                | Reference     |  |
| Postmenopausal/Never used                         | -0.033               | -0.116, 0.050 | -0.032               | -0.115, 0.051 | -0.090                                                             | -0.201, 0.022 | -0.081               | -0.190, 0.027 |  |
| Postmenopausal/Past, not current                  | 0.086                | -0.014, 0.186 | 0.091                | -0.010, 0.191 | 0.083                                                              | -0.095, 0.262 | 0.093                | -0.082, 0.269 |  |
| Postmenopausal/Past, unknown current              | -0.099               | -0.213, 0.015 | -0.106               | -0.221, 0.010 | -0.003                                                             | -0.347, 0.341 | 0.084                | -0.239, 0.406 |  |
| Postmenopausal/Current                            | -0.052               | -0.158, 0.055 | -0.064               | -0.174, 0.046 | NA                                                                 | NA            | NA                   | NA            |  |

Abbreviations: CI, Confidence Interval; NA, Not Applicable

<sup>a</sup> Adjusted for age, BMI, and race

<sup>b</sup> Adjusted for age, BMI, race, and all other factors in the analyses

<sup>c</sup> 1<sup>st</sup> quartile <10; 2<sup>nd</sup> quartile 10-<91 ; 3<sup>rd</sup> quartile 91-<208; and 4<sup>th</sup> quartile  $\geq$ 208 mg
